# Supplementary material for: Structure, ordering, and surfaces of Pt–Fe alloy catalytic nanoparticles from quantitative electron microscopy and X-ray diffraction
Source: Royal Society of Chemistry journal article supplement (doi:10.1039/c2nr31509b), 2012-01-01
Supplement: c2nr31509b.pdf [file c2nr31509b.pdf]

## Supporting Information

### Structure, Ordering, and Surfaces of Pt-Fe Alloy Catalytic Nanoparticles from Quantitative Electron Microscopy and X-ray Diffraction

Mickey C.Y. Chan,<sup>a</sup> Liang Chen,<sup>b</sup> Feihong Nan,<sup>a</sup> James F. Britten,<sup>c</sup> Christina Bock<sup>b</sup> and Gianluigi A. Botton<sup>\*a</sup>

<sup>a</sup> Department of Materials Science and Engineering, McMaster University, 1280 Main Street West, Hamilton, Ontario, Canada, L8S4L8 Tel: 905 525 9140; E-mail: gbotton@mcmaster.ca

<sup>b</sup> Energy and Mining Portfolio, National Research Council of Canada, 1200 Montreal Road, Ottawa Ontario, Canada, K1A0R6

<sup>c</sup> Department of Chemistry, McMaster University, 1280 Main Street West, Hamilton, Ontario, Canada, L8S4L8

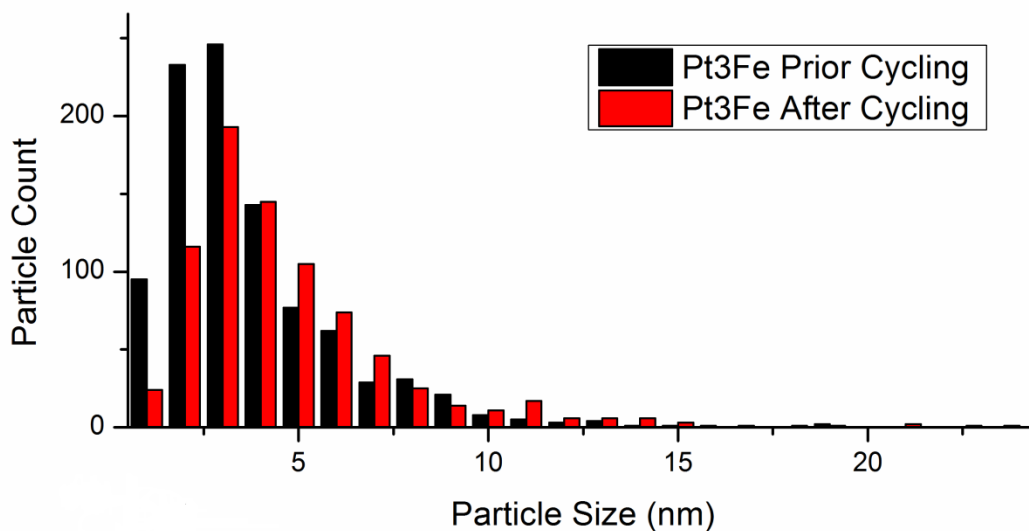

**Fig. S1.** Particle size distribution of Pt<sub>3</sub>Fe before and after electrochemical cycling

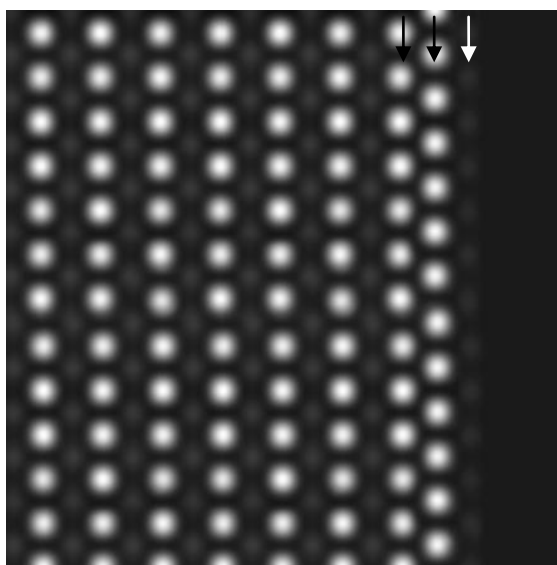

**Fig. S2.** HAADF multi-slice simulation of Pt<sub>3</sub>Fe with a Fe only outer layer (indicated by the white arrow) followed by two layers of Pt only layers (indicated by the black arrows).
